# Supplementary material
Source: publisher figshare collection journal article supplement (https://karger.figshare.com/ndownloader/files/28850967)
Supplement: Supplementary file 1 [file 28850967]

**Table S1: Total body weight of rabbits during follow up and liver weight at the end of experiments.**

| **Body** **weight** | **Permanent** **PVE** **(N=6)** | **Reversible** **PVE** **(N=5)** | **P** **value** |
| --- | --- | --- | --- |
| **Day** **0** **(gr)** | 3300±400 | 3380±280 | 0.724 |
| **Day** **14** **(gr)** | 3240±410 | 3350±250 | 0.587 |
| **Day** **35** **(gr)** | 3490±355 | 3660±240 | 0.357 |
| **Weight Liver lobes** |  |  |  |
| **Total (gr)** | 78±9 | 85±8 | 0.104 |
| **Cranial (embolized) (gr)** | 25±11 | 58±13 | 0.001 |
| **Caudal (non-embolized) (gr)** | 53±5 | 27±7 | 0.0001 |

Values are represented as Mean±SD.
